# Supplementary material for: Temperature-tunable Fano resonance induced by strong coupling between Weyl fermions and phonons in TaAs
Source: PubMed Central journal article supplement (PMC5379101; doi:10.1038/ncomms14933), 2017-03-30
Supplement: ncomms14933-s1.pdf [file ncomms14933-s1.pdf]

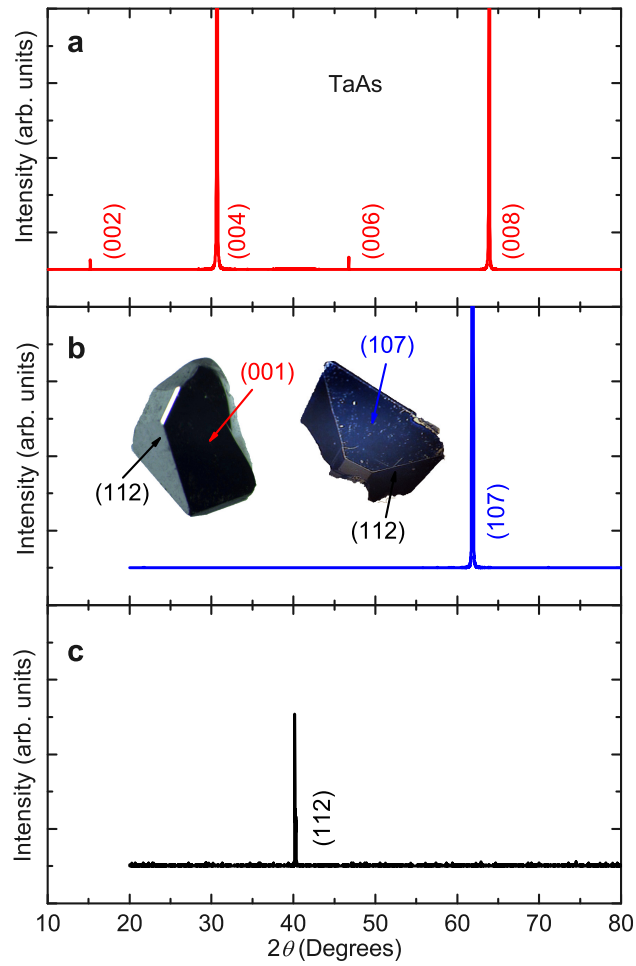

**Supplementary Figure 1 | X-ray diffraction of TaAs.** a–c, X-ray diffraction patterns from the (001), (107) and (112) surfaces of as-grown TaAs single crystals, respectively. The insets of b show the optical images of the measured single crystals, where the Miller indices are marked on corresponding surfaces.

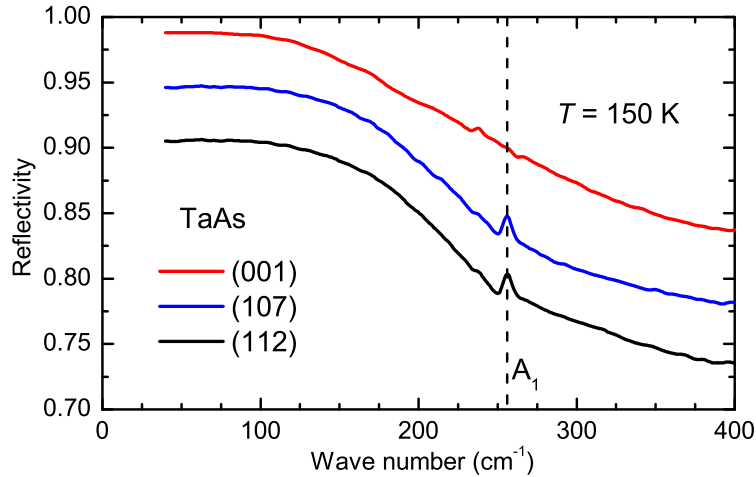

**Supplementary Figure 2 | Far-infrared reflectivity of TaAs.** Reflectivity  $R(\omega)$  in the far-infrared region measured at 150 K on three different surfaces of TaAs: (001) (red curve), (107) (blue curve), and (112) (black curve). The sharp peak at  $\sim 253 \text{ cm}^{-1}$  in  $R(\omega)$  measured on the (107) and (112) surfaces is associated with the IR-active  $A_1$  mode. This mode is active along the  $c$  axis, in good agreement with the fact that it is absent in the  $R(\omega)$  spectrum measured on the (001) surface.

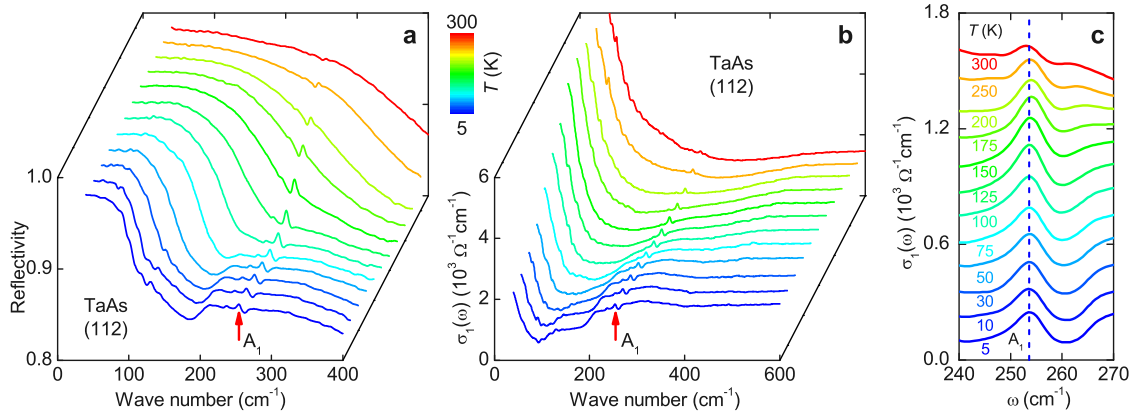

**Supplementary Figure 3 | Reflectivity and optical conductivity of TaAs.** **a**, Far-infrared  $R(\omega)$  of TaAs measured on the (112) surface at 12 different temperatures from 5 to 300 K. **b**, Optical conductivity  $\sigma_1(\omega)$  of TaAs on the (112) surface at different temperatures calculated from  $R(\omega)$  using a Kramers-Kronig analysis. The sharp feature associated with the  $A_1$  mode is indicated by a red arrow in both the  $R(\omega)$  and  $\sigma_1(\omega)$  spectra. **c**, Enlarged view of the optical conductivity in the frequency range of the IR-active  $A_1$  mode. The line shape of this mode exhibits pronounced asymmetry at low temperatures, signaling strong electron-phonon coupling. The asymmetry of the phonon line shape varies dramatically with temperature. All of these observations are identical to the ones made on the (107) surface.

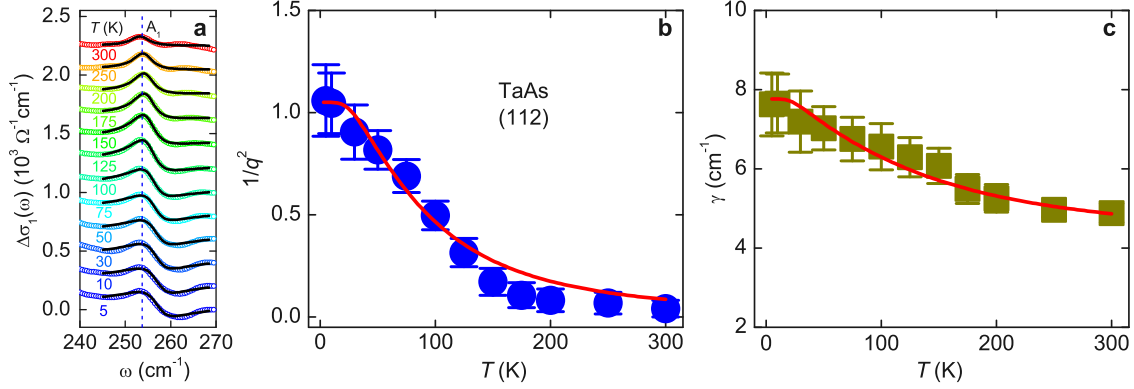

#### Supplementary Figure 4 | Fano fit and temperature dependence of fitting parameters.

**a**, Line shape of the  $A_1$  phonon, extracted from the optical conductivity measured at different temperatures on the (112) surface of TaAs. The black solid lines through the data represent the Fano fitting results. **b**, Temperature dependence of the Fano parameter  $1/q^2$ , which describes the asymmetry of the phonon line shape. The red solid curve is the least-square fit using Eq. (2) in the main text. **c**, The phonon linewidth  $\gamma$  as a function of temperature. The red solid curve denotes the least-square fitting result using the summation of Eq. (4) and Eq. (5) in the main text. Error bars in **b** and **c** are estimated by fitting the phonon line shape to the Fano equation in different frequency ranges at all measured temperatures.

## Supplementary Note 1

Non-centrosymmetric TaAs crystallizes in the  $I4_1md$  space group (No. 109)<sup>1,2</sup> with the irreducible vibrational representation  $[A_1 + E] + [A_1 + 2B_1 + 3E]$ <sup>3</sup>, where the first term represents acoustic modes and the second term corresponds to optical modes. While all the optical modes are Raman active, only the  $A_1$  and  $E$  modes are IR active. All of the optical phonons have been observed in a recent room-temperature Raman spectroscopy study<sup>3</sup>. The frequency ( $\sim 253 \text{ cm}^{-1}$ ) of the phonon we observed in  $R(\omega)$  agrees very well with the  $A_1$  mode that was identified at  $\sim 252 \text{ cm}^{-1}$  by Raman spectroscopy. Furthermore, the  $E$  modes involve vibrations in the  $ab$  plane, while the  $A_1$  mode arises from vibrations along the  $c$  axis<sup>3</sup>. The absence of the  $253 \text{ cm}^{-1}$  mode in  $R(\omega)$  measured on the (001) surface, as shown in Supplementary Fig. 2, indicates that it is active along the  $c$  axis. These observations demonstrate that the  $253 \text{ cm}^{-1}$  phonon in  $R(\omega)$  is associated with the  $A_1$  mode.

## Supplementary References

1. Weng, H., Fang, C., Fang, Z., Bernevig, B. A. & Dai, X. Weyl Semimetal Phase in Noncentrosymmetric Transition-Metal Monophosphides. *Phys. Rev. X* **5**, 011029 (2015).
2. Huang, S.-M. *et al.* A Weyl Fermion semimetal with surface Fermi arcs in the transition metal monopnictide TaAs class. *Nat. Commun.* **6**, 7373 (2015).
3. Liu, H. W. *et al.* Raman study of lattice dynamics in the Weyl semimetal TaAs. *Phys. Rev. B* **92**, 064302 (2015).
